# Supplementary material for: Bromobenzene aliphatic nucleophilic substitution guided controllable and reproducible synthesis of high quality cesium lead bromide perovskite nanocrystals
Source: Royal Society of Chemistry journal article supplement (doi:10.1039/c9qi01095e), 2019-01-01
Supplement: c9qi01095e1.pdf [file c9qi01095e1.pdf]

Electronic Supplementary Information

**Bromobenzene Aliphatic Nucleophilic Substitution Guided  
Controllable and Reproducible Synthesis of High Quality  
Cesium Lead Bromide Perovskite Nanocrystals**

Feiming Li<sup>a,d</sup>, Fangyuan Lin<sup>a</sup>, Yipeng Huang<sup>a</sup>, Zhixiong Cai<sup>d</sup>, Linhang Qiu<sup>a</sup>, Yimeng Zhu<sup>a</sup>, Yaqi Jiang<sup>a</sup>, Yiru Wang<sup>a</sup>, Xi Chen<sup>a,b,c\*</sup>

*<sup>a</sup>The MOE Key Laboratory of Spectrochemical Analysis and Instrumentation, College of Chemistry and Chemical Engineering,*

*Xiamen University, Xiamen, 361005, P.R. China.*

*<sup>b</sup>State Key Laboratory of Marine Environmental Science, Xiamen University, Xiamen, 361005, P.R. China. Email:*

*[xiichen@xmu.edu.cn](mailto:xiichen@xmu.edu.cn)*

*<sup>c</sup>Shenzhen Research Institute of Xiamen University, Shenzhen 518000, China*

*<sup>d</sup>College of Chemistry, Chemical Engineering and Environment, Minnan Normal University, Zhangzhou, 363000, P.R. China.*

## Table of Contents

**Figure S1.** TEM images of CsPbBr<sub>3</sub> PNCs and their corresponding histograms of size distributions of different concentrations of OAm from 0.25 ml (a, b); 0.5 ml (c, d), 0.75 ml (e, f) and 1.0 ml (g, h), which reacted with 16.2 mg of Cs<sub>2</sub>CO<sub>3</sub>, 37.7 mg of lead stearate and 71.2 mg of TBB under continuous heating to 160 °C under vigorous stirring.

**Figure S2.** TEM images of CsPbBr<sub>3</sub> PNCs obtained from stoichiometric ratio of 1 : 1 : 3 that 8.1 mg of Cs<sub>2</sub>CO<sub>3</sub>, 38.7 mg of lead stearate and 35.6 mg of TBB were put into 5 ml of octadecene containing 0.75 ml of OAm at room temperature and then heated to 200 °C in the open air under vigorous stirring.

**Figure S3.** Histograms of emission wavelength, PLQY and FWHM among twenty batches produced by three different experimenters. (16.3 mg of Cs<sub>2</sub>CO<sub>3</sub>, 38.7 mg of lead stearate and 71.3 mg of TBB were put into 5 ml of ODE containing 0.75 ml of OAm at room temperature and then heated to 160 °C in the open air under vigorous stirring.

**Figure S4.** The synthesized CsPbBr<sub>3</sub> PNCs stability comparisons over time (days) under ambient conditions.

**Figure S5.** Gram scale synthesis of CsPbBr<sub>3</sub> PNCs in one pot. Photographs of the crude solution CsPbBr<sub>3</sub> PNCs obtained under UV lamp with  $\lambda$  of 365 nm PL spectrum of CsPbBr<sub>3</sub> PNCs obtained with a PL maximum at 514 nm, FWHM of 20.6 nm and PLQY of 86% (a) ; corresponding dried CsPbBr<sub>3</sub> PNCs powder (b); and TEM images of the obtained CsPbBr<sub>3</sub> PNCs.

**Figure S6.** (a) absorption (black line) and PL (red line) spectra of CH<sub>3</sub>NH<sub>3</sub>PbBr<sub>3</sub> PNCs with a PL maximum at 521 nm, FWHM of 27 nm (Inset photograph of CH<sub>3</sub>NH<sub>3</sub>PbBr<sub>3</sub> PNCs in hexane solution under (left) normal white light and (right) a UV lamp with  $\lambda$  of 365 nm); (b) XRD pattern of CH<sub>3</sub>NH<sub>3</sub>PbBr<sub>3</sub> PNCs. (c) TEM images of CH<sub>3</sub>NH<sub>3</sub>PbBr<sub>3</sub> PNCs.

**Figure S7.** Investigation of determination conditions of reaction time (a), stirring rate (b), pH (c) with an optimized condition of reaction time of 5 min at room temperature (25 °C), stirring rate of 1500 rpm/min and pH of 1; and (d) selectivity of this assay in 60 mM Cl<sup>-</sup> at pH = 1 against various coexisting materials under physiological conditions of sweat.

**Table S1.** Recovery rates and relative standard deviations (RSD) for detection of chloride ions in three different samples based on the wavelength shift of CsPbBr<sub>3</sub> PNCs

## Methods

### Chemicals and reagents

Oleylamine (OAm, 90%, AR), octadecene (ODE, 90%, AR), lead stearate,  $\text{Cs}_2\text{CO}_3$  (99.9%), n-octylamine, acetyl bromide, N-methylformamide were purchased from Aladdin (Shanghai, China). Dodecylamine were purchased from Sigma Addrich. Benzyl bromide,  $\alpha,\alpha'$ -dibromo-p-xylene, 1, 3, 5-tris (bromomethyl) benzene and were purchased from Energy Chemical. ODE and OAm were dried under vacuum for 1h at 120 °C before use.

### Synthesis of $\text{CsPbBr}_3$ and $\text{CH}_3\text{NH}_3\text{PbBr}_3$ PNCs

Typically, for the synthesis of  $\text{CsPbBr}_3$  PNCs, 5 ml ODE, 0.75 ml OAm, 0.016 g  $\text{Cs}_2\text{CO}_3$  and, 0.0387 g lead stearate, 0.071 g 1, 3, 5-tris (bromomethyl) benzene were sequentially loaded into 25 ml 3-neck flask under vigorous stirring of 2500 rpm and the temperature was raised to 160 °C under ambient atmospheric conditions, and the reaction mixture was cooled by the ice-water bath. The mixture were purified by ethyl acetate / hexane and then were separated by centrifugation at 10000 rpm for 10 min for three times before further characterization. Gram scale synthesis of  $\text{CsPbBr}_3$  PNCs could be easily carried out just by amplified 30 folds. Similar to the synthesis of  $\text{CsPbBr}_3$  PNCs, the  $\text{CH}_3\text{NH}_3\text{PbBr}_3$  PNCs could be synthesized just using 30  $\mu\text{L}$  of N-methylformamide instead of  $\text{Cs}_2\text{CO}_3$ .

### Characterization

The fluorescence emission spectra were recorded by a FL4500 spectrophotometer. Shimadzu UV-2550 spectrophotometer with one pair of 10 mm quartz cell was employed for the absorption spectra recording. FEI Tecnai-G2-F30 Transmission Electron Microscopic (TEM) was employed to obtain TEM images (at 200 kV). The X-ray diffractometer (Bruker D8 Advance, Bruker AXS, Germany) was operated at 40 kV and 15 mA, and Nickel-filtered  $\text{Cu K}\alpha$  radiation was used in the incident beam.

### Determination of HCl

5  $\mu\text{L}$  of HCl stock solutions of different concentrations from 0 to 36% were added into 1ml of  $\text{CsPbBr}_3$

PNCs hexane solutions under vigorous shaking for 1min. Then the PL were recorded. The sample of HCl solutions of certain concentrations were detected according to the procedure mentioned above.

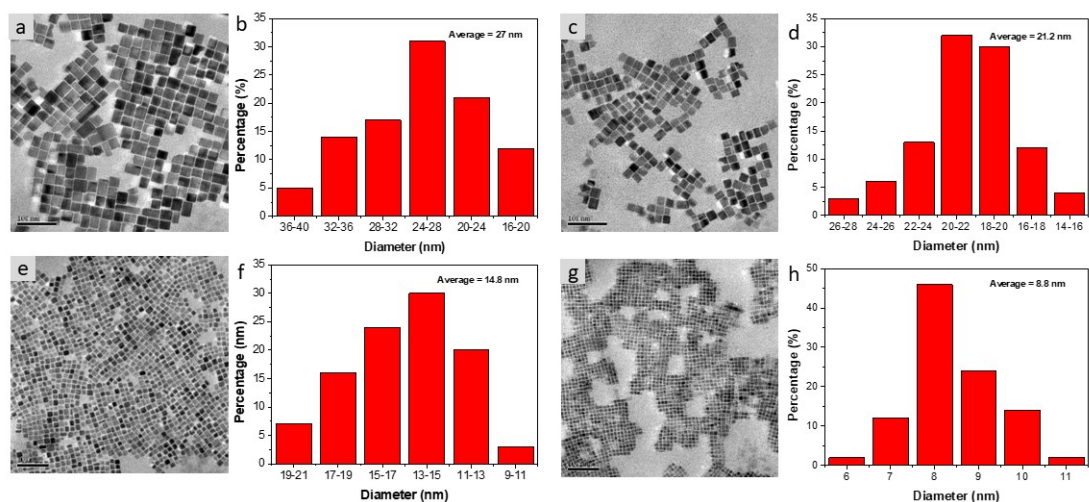

**Figure S1.** TEM images of CsPbBr<sub>3</sub> PNCs and their corresponding histograms of size distributions of different concentrations of OAm from 0.25 ml (a, b); 0.5 ml (c, d), 0.75 ml (e, f) and 1.0 ml (g, h), which reacted with 16.2 mg of Cs<sub>2</sub>CO<sub>3</sub>, 37.7 mg of lead stearate and 71.2 mg of TBB under continuous heating to 160 °C under vigorous stirring.

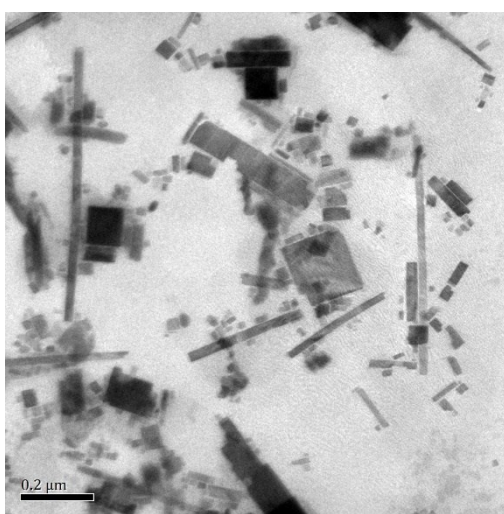

**Figure S2.** TEM images of CsPbBr<sub>3</sub> PNCs obtained from stoichiometric ratio of 1 : 1 : 3 that 8.1 mg of Cs<sub>2</sub>CO<sub>3</sub>, 38.7 mg of lead stearate and 35.6 mg of TBB were put into 5 ml of octadecene containing 0.75 ml of OAm at room temperature and then heated to 200 °C in the open air under vigorous stirring.

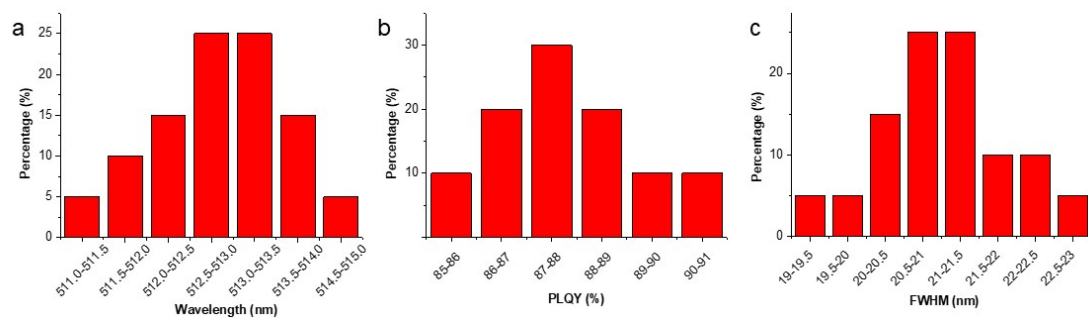

**Figure S3.** Histograms of emission wavelength, PLQY and FWHM among twenty batches produced by three different experimenters. (16.3 mg of  $\text{Cs}_2\text{CO}_3$ , 38.7 mg of lead stearate and 71.3 mg of TBB were put into 5 ml of ODE containing 0.75 ml of OAm at room temperature and then heated to 160 °C in the open air under vigorous stirring.

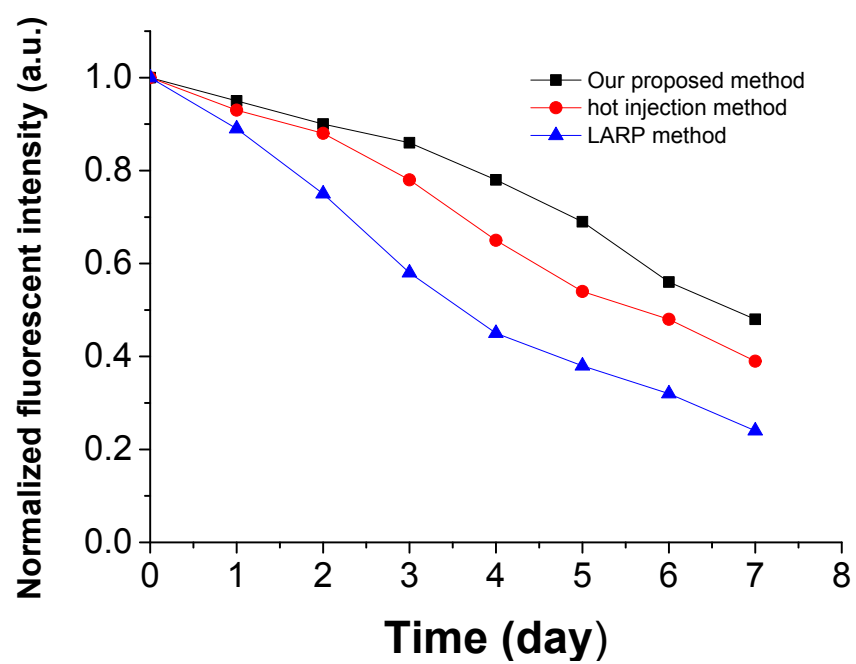

Figure S4. The synthesized CsPbBr<sub>3</sub> PNCs stability comparisons over time (days) under ambient conditions.

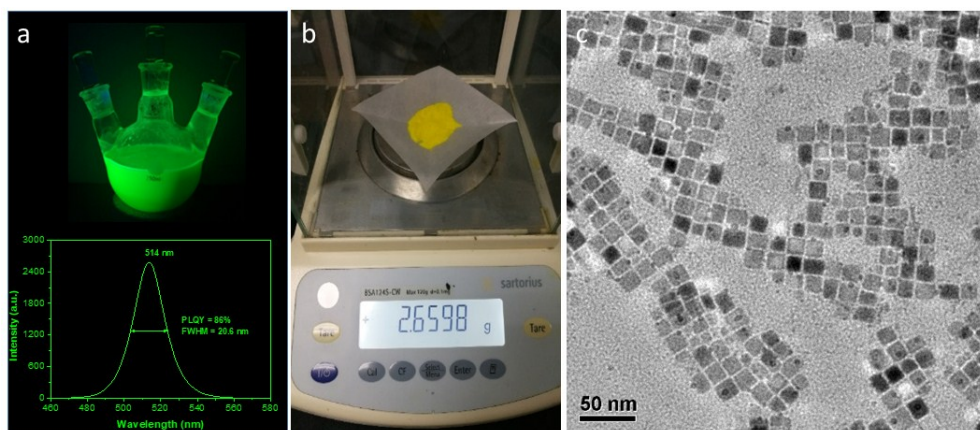

**Figure S5.** Gram scale synthesis of CsPbBr<sub>3</sub> PNCs in one pot. Photographs of the crude solution CsPbBr<sub>3</sub> PNCs obtained under UV lamp with  $\lambda$  of 365 nm PL spectrum of CsPbBr<sub>3</sub> PNCs obtained with a PL maximum at 514 nm, FWHM of 20.6 nm and PLQY of 86% (a) ; corresponding dried CsPbBr<sub>3</sub> PNCs powder (b); and TEM images of the obtained CsPbBr<sub>3</sub> PNCs.



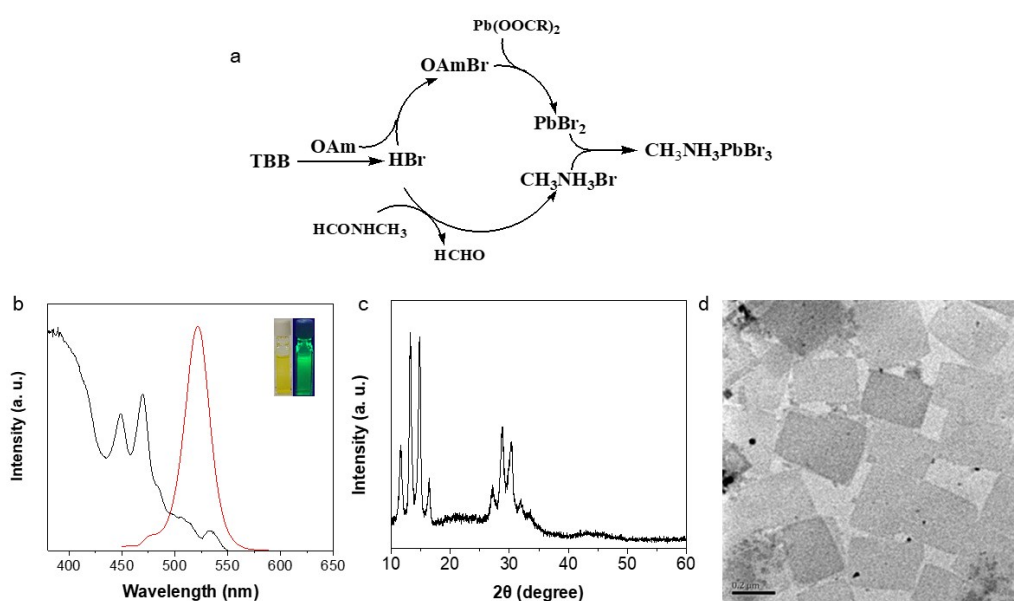

**Figure S6.** (a) absorption (black line) and PL (red line) spectra of CH<sub>3</sub>NH<sub>3</sub>PbBr<sub>3</sub> PNCs with a PL maximum at 521 nm, FWHM of 27 nm (Inset photograph of CH<sub>3</sub>NH<sub>3</sub>PbBr<sub>3</sub> PNCs in hexane solution under (left) normal white light and (right) a UV lamp with  $\lambda$  of 365 nm); (b) XRD pattern of CH<sub>3</sub>NH<sub>3</sub>PbBr<sub>3</sub> PNCs. (c) TEM images of CH<sub>3</sub>NH<sub>3</sub>PbBr<sub>3</sub> PNCs.

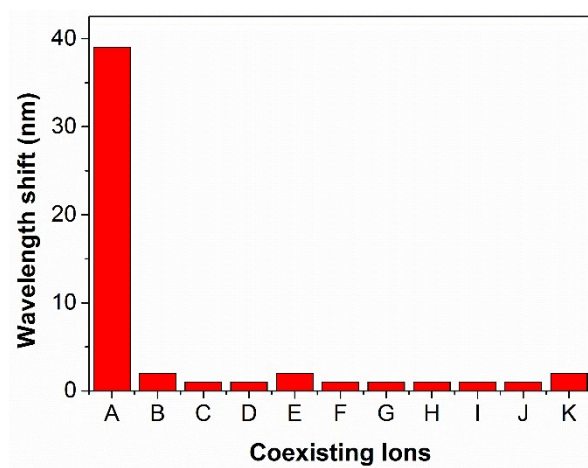

**Figure S7.** Selectivity of for CsPbBr<sub>3</sub> NCs the detection of HCl over other ions: the concentrations of HCl are 6%; the concentration of the other ions is 0.05%. From A to K are Cl<sup>-</sup>, NO<sub>3</sub><sup>-</sup>, PO<sub>4</sub><sup>3-</sup>, SO<sub>4</sub><sup>2-</sup>, CO<sub>3</sub><sup>2-</sup>, K<sup>+</sup>, Na<sup>+</sup>, Ca<sup>2+</sup>, Mg<sup>2+</sup>, Fe<sup>3+</sup>, Mn<sup>2+</sup>.

**Table S1.** Recovery rates and relative standard deviations (RSD) for detection of HCl in three different samples based on the wavelength shift of CsPbBr<sub>3</sub> PNCs

| Sample | Average found (%)<br>(n = 3) | HCl added (%) | HCl found (%) | Recovery rate (%) | R.S.D.(%)<br>(n = 3) |
|--------|------------------------------|---------------|---------------|-------------------|----------------------|
| 1      | 6.2                          | 5             | 11.6          | 103.6%            | 3.7                  |
| 2      | 18.4                         | 5             | 23.1          | 98.7              | 5.6                  |
| 3      | 27.9                         | 5             | 33.2          | 100.9%            | 7.2                  |
